# Supplementary material for: Assessing the Protective Role of Epigallocatechin Gallate (EGCG) against Water-Pipe Smoke-Induced Toxicity: A Comparative Study on Gene Expression and Histopathology
Source: MDPI journal article supplement (doi:10.3390/molecules28227502), 2023-11-09
Supplement: s1 [file s1]

**Supplementary Table S1.**The Anti-Inflammatory Effects of Epigallocatechin gallate (EGCG) on Inflammatory Markers expression IL-6, IL1B, and TNF- $\alpha$  in BALB/c mice Exposed to Flavored and Unflavored Water-Pipe Smoke.

|               | FWP              | UFWP             | FWP+EGCG         | UFWP+EGCG        |
|---------------|------------------|------------------|------------------|------------------|
| IL-6          | +2.57 $\pm$ 0.12 | +2.04 $\pm$ 0.18 | +1.01 $\pm$ 0.30 | +0.29 $\pm$ 0.05 |
| IL1B          | +3.21 $\pm$ 0.09 | +2.20 $\pm$ 0.19 | +1.75 $\pm$ 0.08 | +0.90 $\pm$ 0.24 |
| TNF- $\alpha$ | +5.00 $\pm$ 0.28 | +4.43 $\pm$ 0.15 | +3.35 $\pm$ 0.05 | +2.57 $\pm$ 0.13 |

Gene expression values are denoted as Mean  $\pm$  SD, adjusted by subtracting control values. Positive values indicate an increase in levels when compared to the control. Negative values indicate a decrease in levels when compared to the control.

**Supplementary Table S2.**Modulating Effects of Epigallocatechin gallate (EGCG) on Antioxidant Gene Expression in Kidney Tissues Exposed to Flavored and Unflavored Water-Pipe Smoke.

|         | FWP              | UFWP             | FWP+EGCG         | UFWP+EGCG        |
|---------|------------------|------------------|------------------|------------------|
| CAT     | +7.36 $\pm$ 0.18 | +6.13 $\pm$ 0.14 | +2.63 $\pm$ 0.14 | +1.15 $\pm$ 0.17 |
| GP XI   | +4.98 $\pm$ 0.14 | +5.89 $\pm$ 0.15 | +3.15 $\pm$ 0.10 | +3.40 $\pm$ 0.17 |
| MT-I    | +5.36 $\pm$ 0.14 | +4.21 $\pm$ 0.21 | +1.76 $\pm$ 0.14 | +2.86 $\pm$ 0.13 |
| MT-II   | +2.83 $\pm$ 0.14 | +1.46 $\pm$ 0.11 | +0.02 $\pm$ 0.16 | -2.34 $\pm$ 0.10 |
| SOD-I   | +5.63 $\pm$ 0.28 | +7.26 $\pm$ 0.17 | +4.25 $\pm$ 0.11 | +2.68 $\pm$ 0.07 |
| SOD-II  | +0.99 $\pm$ 0.14 | +1.49 $\pm$ 0.14 | +0.22 $\pm$ 0.04 | -1.49 $\pm$ 0.04 |
| SOD-III | +7.88 $\pm$ 0.15 | +5.73 $\pm$ 0.08 | +3.32 $\pm$ 0.14 | +2.02 $\pm$ 0.21 |

Gene expression values are denoted as Mean  $\pm$  SD, adjusted by subtracting control values. Positive values indicate an increase in levels when compared to the control. Negative values indicate a decrease in levels when compared to the control.

**Supplementary Table S3.**Modulating Effects of Epigallocatechin gallate (EGCG) on Antioxidant Gene Expression in Liver Tissues Exposed to Flavored and Unflavored Water-Pipe Smoke.

|         | <b>FWP</b> | <b>UFWP</b> | <b>FWP+EGCG</b> | <b>UFWP+EGCG</b> |
|---------|------------|-------------|-----------------|------------------|
| CAT     | +3.15±0.17 | +2.63±0.14  | +0.79±0.10      | +0.50±0.09       |
| GP XI   | +1.92±0.06 | +2.84±0.14  | +0.62±0.05      | +1.15±0.10       |
| MT-I    | +1.45±0.12 | +0.79±0.06  | -2.12±0.11      | -2.65±0.08       |
| MT-II   | +2.15±0.17 | +4.41±0.11  | +1.09±0.08      | +0.22±0.08       |
| SOD-I   | +1.72±0.11 | +0.83±0.13  | -3.17±0.14      | -2.46±0.06       |
| SOD-II  | +0.25±0.08 | +1.09±0.16  | -2.11±0.14      | -1.73±0.04       |
| SOD-III | +2.22±0.21 | +1.85±0.11  | +0.24±0.04      | -0.47±0.03       |

Gene expression values are denoted as Mean ± SD, adjusted by subtracting control values. Positive values indicate an increase in levels when compared to the control. Negative values indicate a decrease in levels when compared to the control.

**Supplementary Table S4.**Modulating Effects of Epigallocatechin gallate (EGCG) on Antioxidant Gene Expression in Lung Tissues Exposed to Flavored and Unflavored Water-Pipe Smoke.

|         | <b>FWP</b>  | <b>UFWP</b> | <b>FWP+EGCG</b> | <b>UFWP+EGCG</b> |
|---------|-------------|-------------|-----------------|------------------|
| CAT     | +22.46±0.04 | +17.59±0.13 | +12.14±0.15     | +8.04±0.30       |
| GP XI   | +17.48±0.06 | +15.31±0.18 | +10.69±0.20     | +5.04±0.36       |
| MT-I    | +8.17±0.30  | +10.13±0.24 | +2.28±0.17      | +0.80±0.08       |
| MT-II   | +11.84±0.08 | +7.55±0.08  | +3.65±0.18      | +1.81±0.11       |
| SOD-I   | +7.29±0.16  | +5.17±0.16  | +1.94±0.16      | +0.79±0.08       |
| SOD-II  | +11.71±0.12 | +12.81±0.17 | +5.11±0.31      | +3.78±0.12       |
| SOD-III | +3.77±0.01  | +2.64±0.16  | +1.35±0.11      | +0.29±0.16       |

Gene expression values are denoted as Mean ± SD, adjusted by subtracting control values. Positive values indicate an increase in levels when compared to the control. Negative values indicate a decrease in levels when compared to the control.
